# Supplementary material
Source: Royal Society of Chemistry journal article supplement (doi:10.1039/d6nr00405a)
Supplement: d6nr00405a1.pdf [file d6nr00405a1.pdf]

## Supplementary information file:

### Optimizing the supercapacitive performance of MoS<sub>2</sub> by multivalent tungsten ion doping

Ion Nesterovschi,<sup>a,b</sup> Ameen Uddin Ammar,<sup>a</sup> Adriana Popa,<sup>a</sup> Maria Stefan,<sup>a</sup> Dana Toloman,<sup>a</sup> Sergiu Gabriel Macavei,<sup>a</sup> Cristina Leostean,<sup>a</sup> Lucian Barbu Tudoran,<sup>a</sup> Maria Mihet,<sup>a</sup> Ana Varadi,<sup>a,c</sup> Emre Erdem,<sup>a,d</sup> and Arpad Mihai Rostas<sup>\*a</sup>

<sup>a</sup> National Institute for Isotopic and Molecular Technologies, Donat 67-103, Cluj-Napoca, Romania.

<sup>b</sup> Doctoral School of Physics, Babes-Bolyai University, Mihai Kogalniceanu 1, Cluj-Napoca, Romania.

<sup>c</sup> Doctoral School of Chemistry, Babes-Bolyai University, Mihai Kogalniceanu 1, Cluj-Napoca, Romania.

<sup>d</sup> Faculty of Engineering and Natural Sciences, Sabanci University, Tuzla, Istanbul, Turkey.

\* Corresponding author: [arpad.rostas@itim-cj.ro](mailto:arpad.rostas@itim-cj.ro)

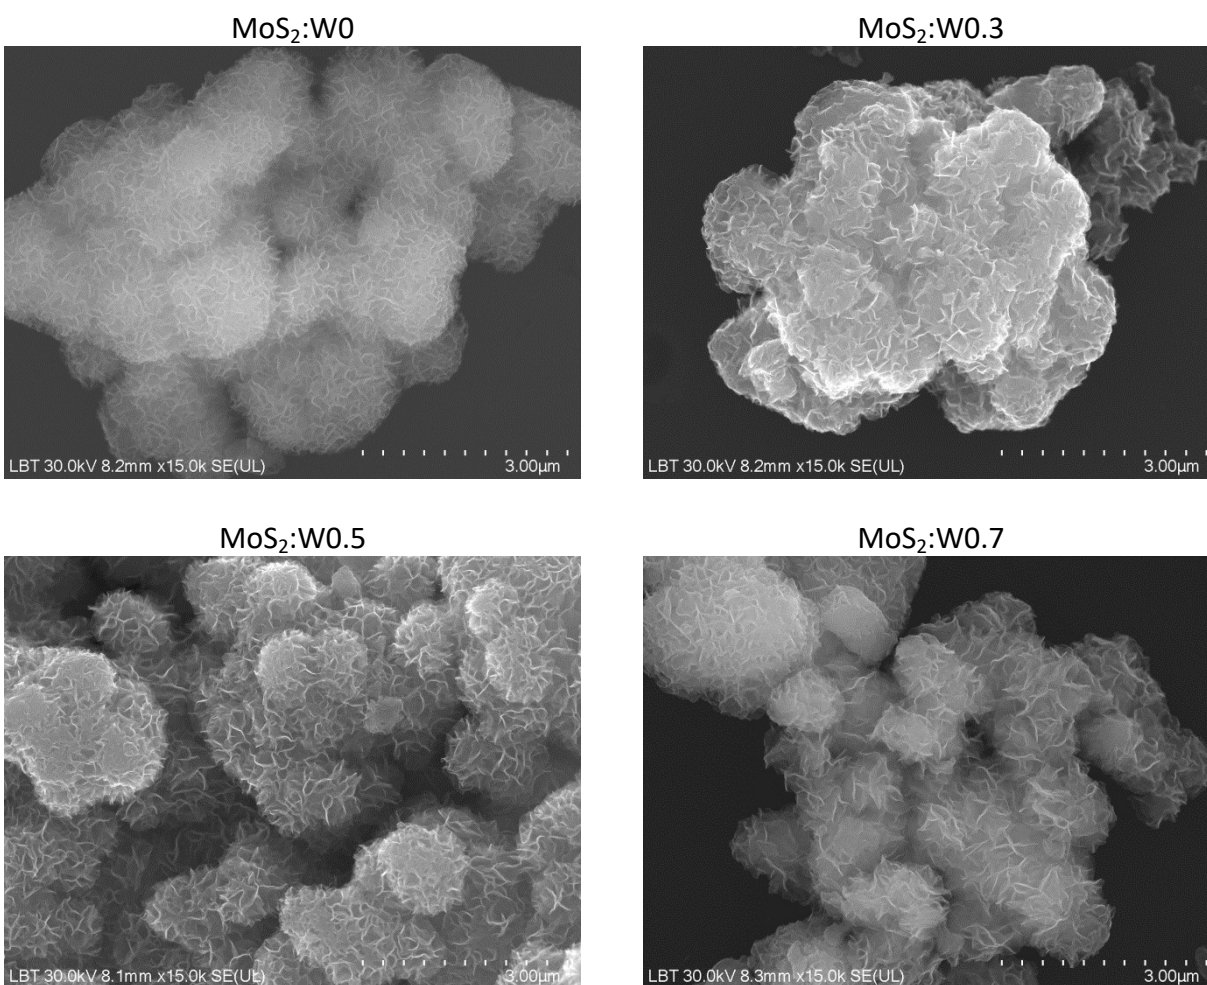

**Figure S1:** STEM micrographs of the undoped and W-doped MoS<sub>2</sub> samples.

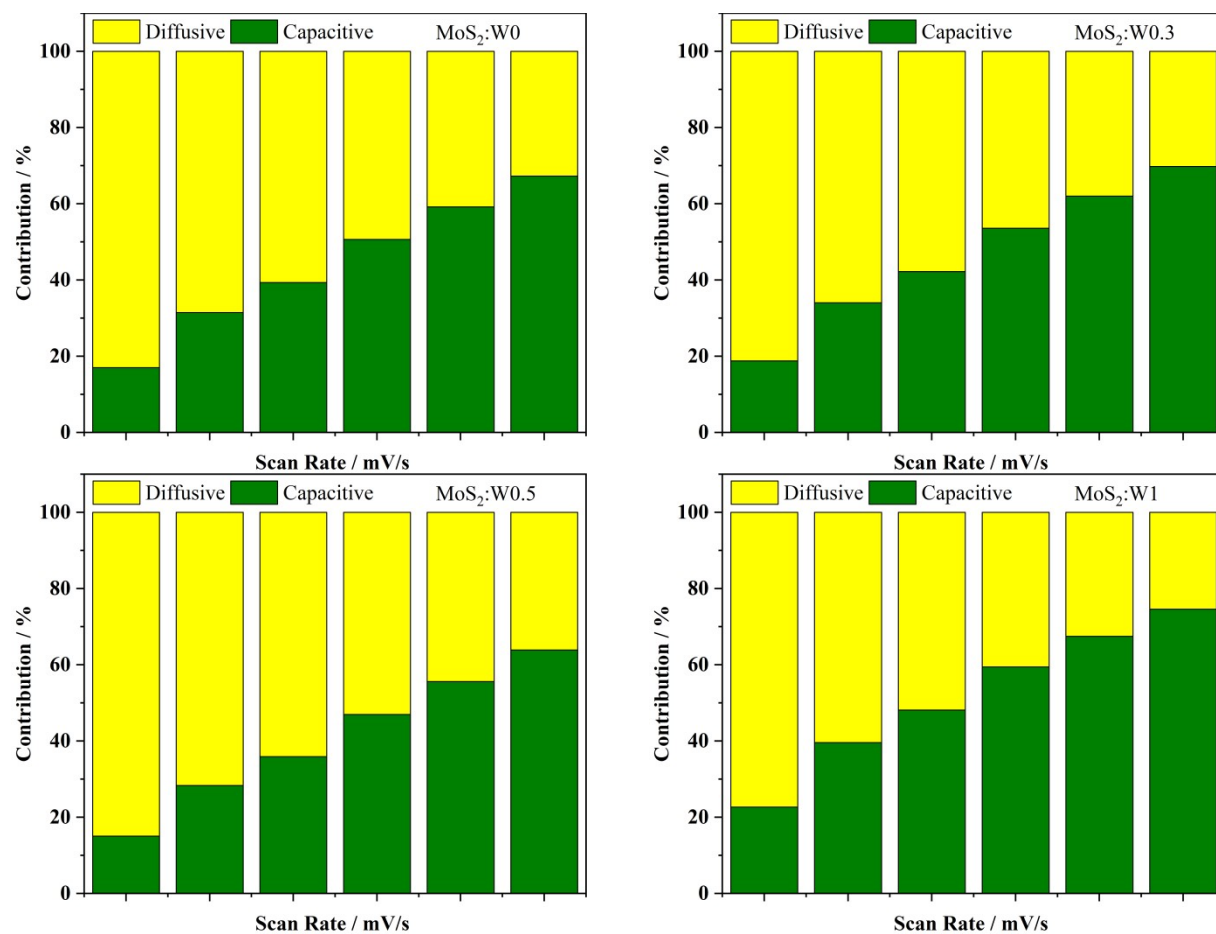

**Figure S2:** Dunn's analysis results of the undoped and W-doped MoS<sub>2</sub>-based symmetric SC devices, showing the diffusive and capacitive contributions at different scan rates.

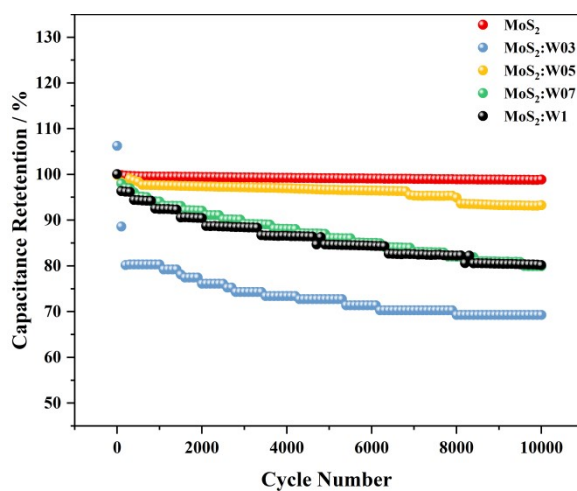

**Figure S3:** Capacitance Retention as a function of the cycle number measured at 3 A/g for all MoS<sub>2</sub>:W samples used as electrode materials for supercapacitors.
